# Supplementary material for: Unique features of the grapevine VvK5.1 channel support novel functions for outward K+ channels in plants
Source: PubMed Central journal article supplement — J Exp Bot. 2019 Jul 20;70(21):6181–93. doi: 10.1093/jxb/erz341 (PMC6859719; doi:10.1093/jxb/erz341), 2019-07-20
Supplement: erz341_suppl_supplementary_figure_s1_table_s1.pdf [file erz341_suppl_supplementary_figure_s1_table_s1.pdf]

| Name               | Sequence                                                      |
|--------------------|---------------------------------------------------------------|
| VvK5.1-V2-F1       | 5'-GATTTGAAAGAAGGCAAATGAATCGC-3'                              |
| VvK5.1-V2-R1       | 5'- CAGCAGACGAAACACTAAATATCTAG-3'                             |
| VvK5.1-V2-qP-3'-F1 | 5'-AGAGAGATCACAGATAAAATGCACC-3'                               |
| VvK5.1-V2-qP-3'-R1 | 5'-CATGATGCCAGGCCTTTTATGT-3'                                  |
| EF1-F              | 5'-TCTGCCTTCTTCCTTGGGTA-3'                                    |
| EF1-R              | 5'-GCACCTCGATCAAAAGAGGA-3'                                    |
| VvK5.1-V2-up       | 5'-GGTTGTTGATGACGAAGACGATG-3'                                 |
| VvK5.1-V2-down     | 5'-GAAGCAGCTACCGCCACTG-3'                                     |
| T7P-VvK5.1-V2-up   | 5'-GAAATTAATACGACTCACTATAGGGAGAGGTTGTTGATGACGAAGA<br>CGATG-3' |
| T7P-VvK5.1-V2-down | 5'-GAAATTAATACGACTCACTATAGGGAGAGAAGCAGCTACCGCCACT<br>G-3'     |
| VvK5.1-prom-Fw1    | 5'-CCAAAATCTACTCAAGTCCAATCCC-3'                               |
| VvK5.1-prom-Rv1    | 5'-CGTCTTCGTCATCAACAACCTG-3'                                  |
| VvK5.1-prom-Fw2    | 5'-GAAGAGTCGATTAAGGAGTATGAAGTG-3'                             |
| VvK5.1-prom-Rv2    | 5'-CCCCTCCCAACCAAATACATGA-3'                                  |

Table S1. Primers used in this study.

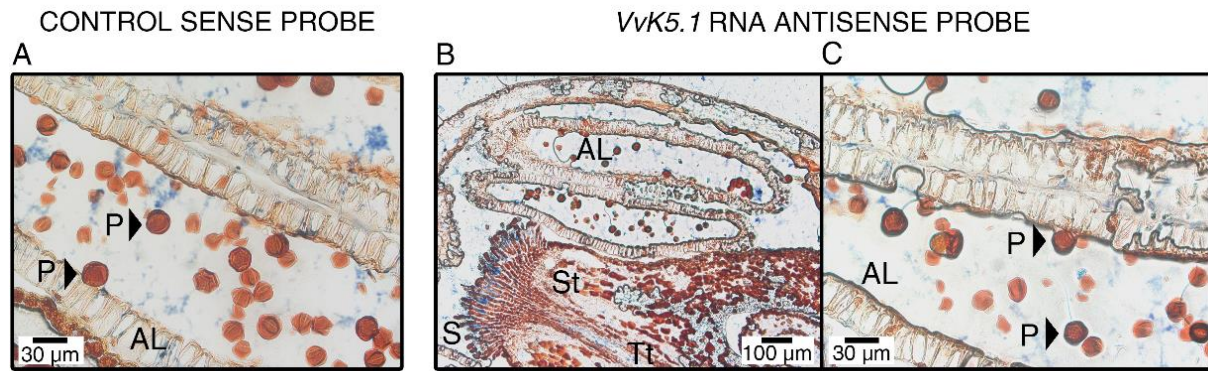

Fig. S1. *In situ* localization of *VvK5.1* transcripts in flowers, showing pollen (P). Longitudinal sections hybridized with the control sense probe (A) and the *VvK5.1* antisense probe (B and C) did not show any signal in pollen. P, pollen; AL, Anther locule; S, stigmas; St, style; Tt, transmitting track.
